# Supplementary material for: Factor H autoantibody is associated with atypical hemolytic uremic syndrome in children in the United Kingdom and Ireland
Source: PubMed Central journal article supplement (PMC5652378; doi:10.1016/j.kint.2017.04.028), 2017-11

Supplemental Figure 1: Serum creatinine and platelet values at presentation

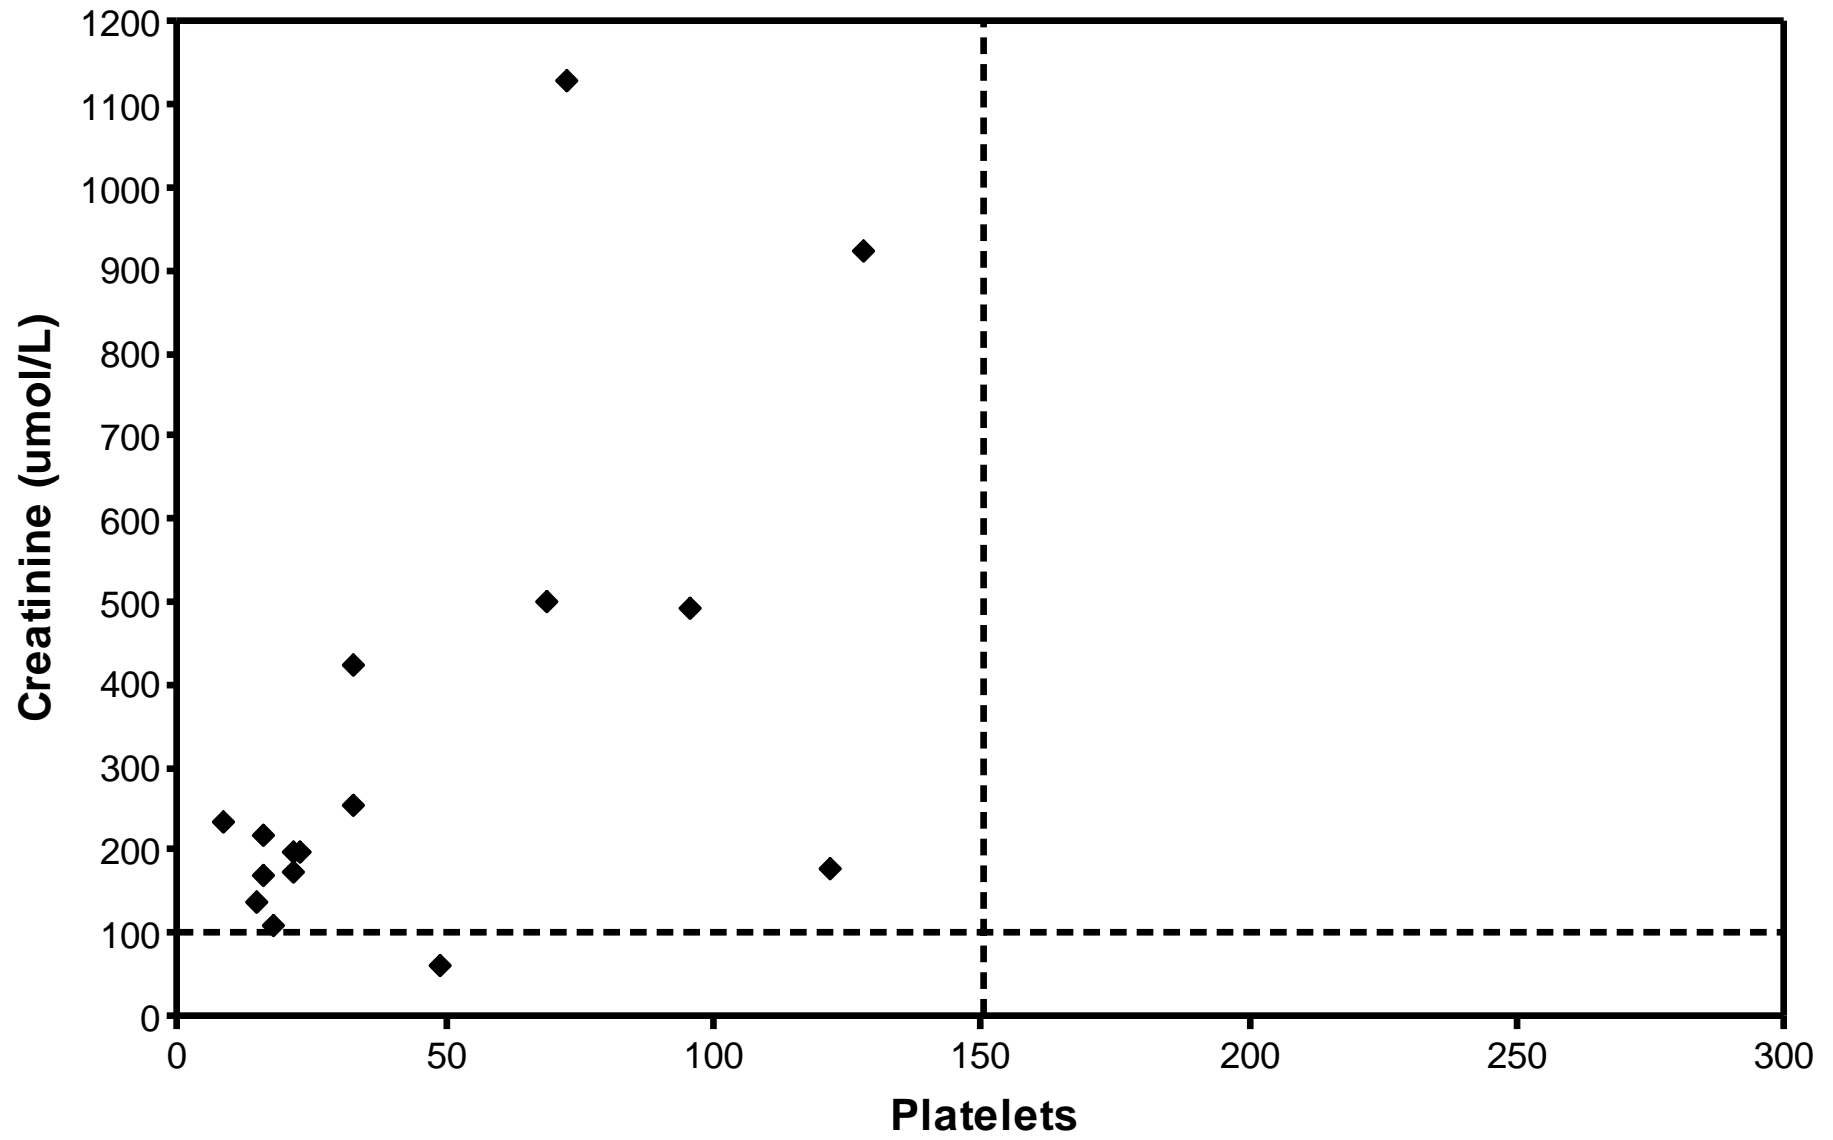

Supplement: mmc2.pdf [file mmc2.pdf]
