# Supplementary material for: Factor H autoantibody is associated with atypical hemolytic uremic syndrome in children in the United Kingdom and Ireland
Source: PubMed Central journal article supplement (PMC5652378; doi:10.1016/j.kint.2017.04.028), 2017-11

**Supplemental Figure 2: Initial complement antigenic levels. A. C3. Normal in 76% of patients. B. C4. Normal in 71% of patients. C. Factor I. Normal in all patients.**  
The dashed lines represent the lower limit of the normal ranges.

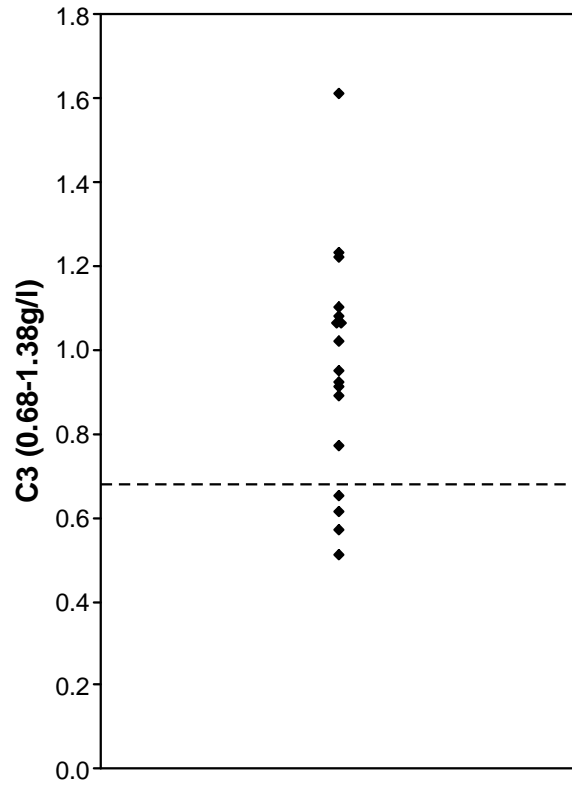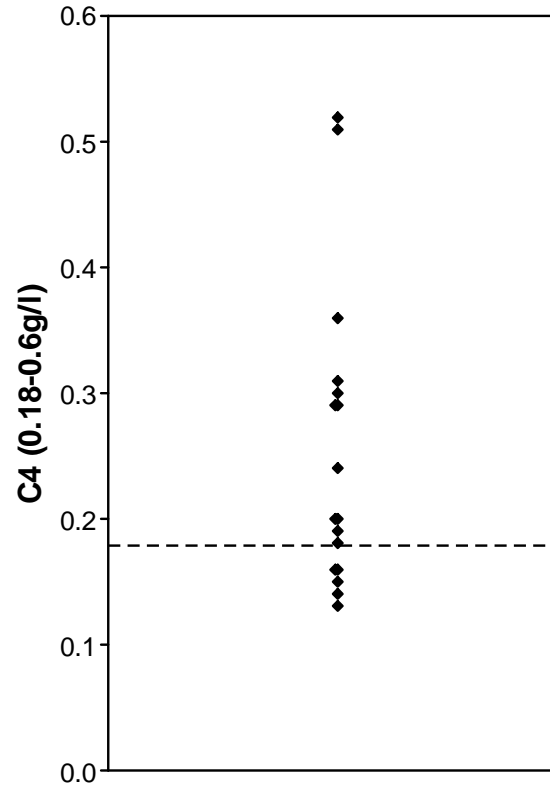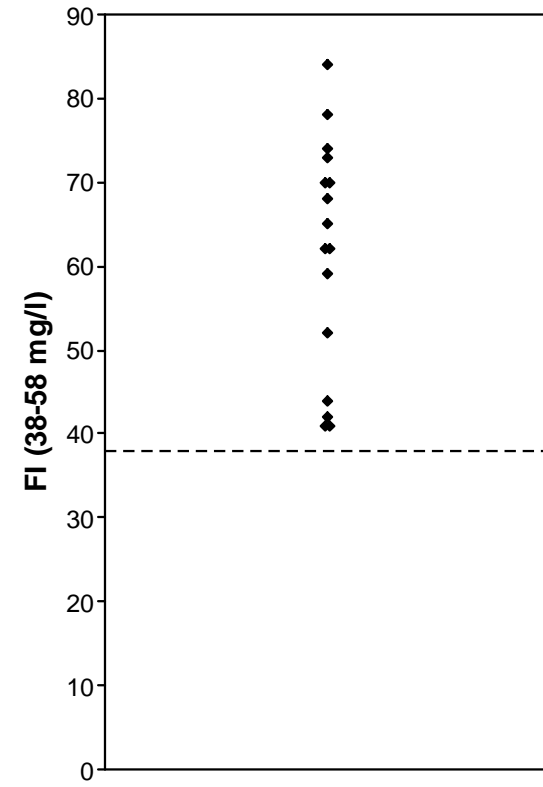

Supplement: mmc3.pdf [file mmc3.pdf]
