# Supplementary material for: Factor H autoantibody is associated with atypical hemolytic uremic syndrome in children in the United Kingdom and Ireland
Source: PubMed Central journal article supplement (PMC5652378; doi:10.1016/j.kint.2017.04.028), 2017-11

### Supplemental Figure 3: C4 level and FH/autoantibody circulating immune complexes

Abbreviations: RU, relative units

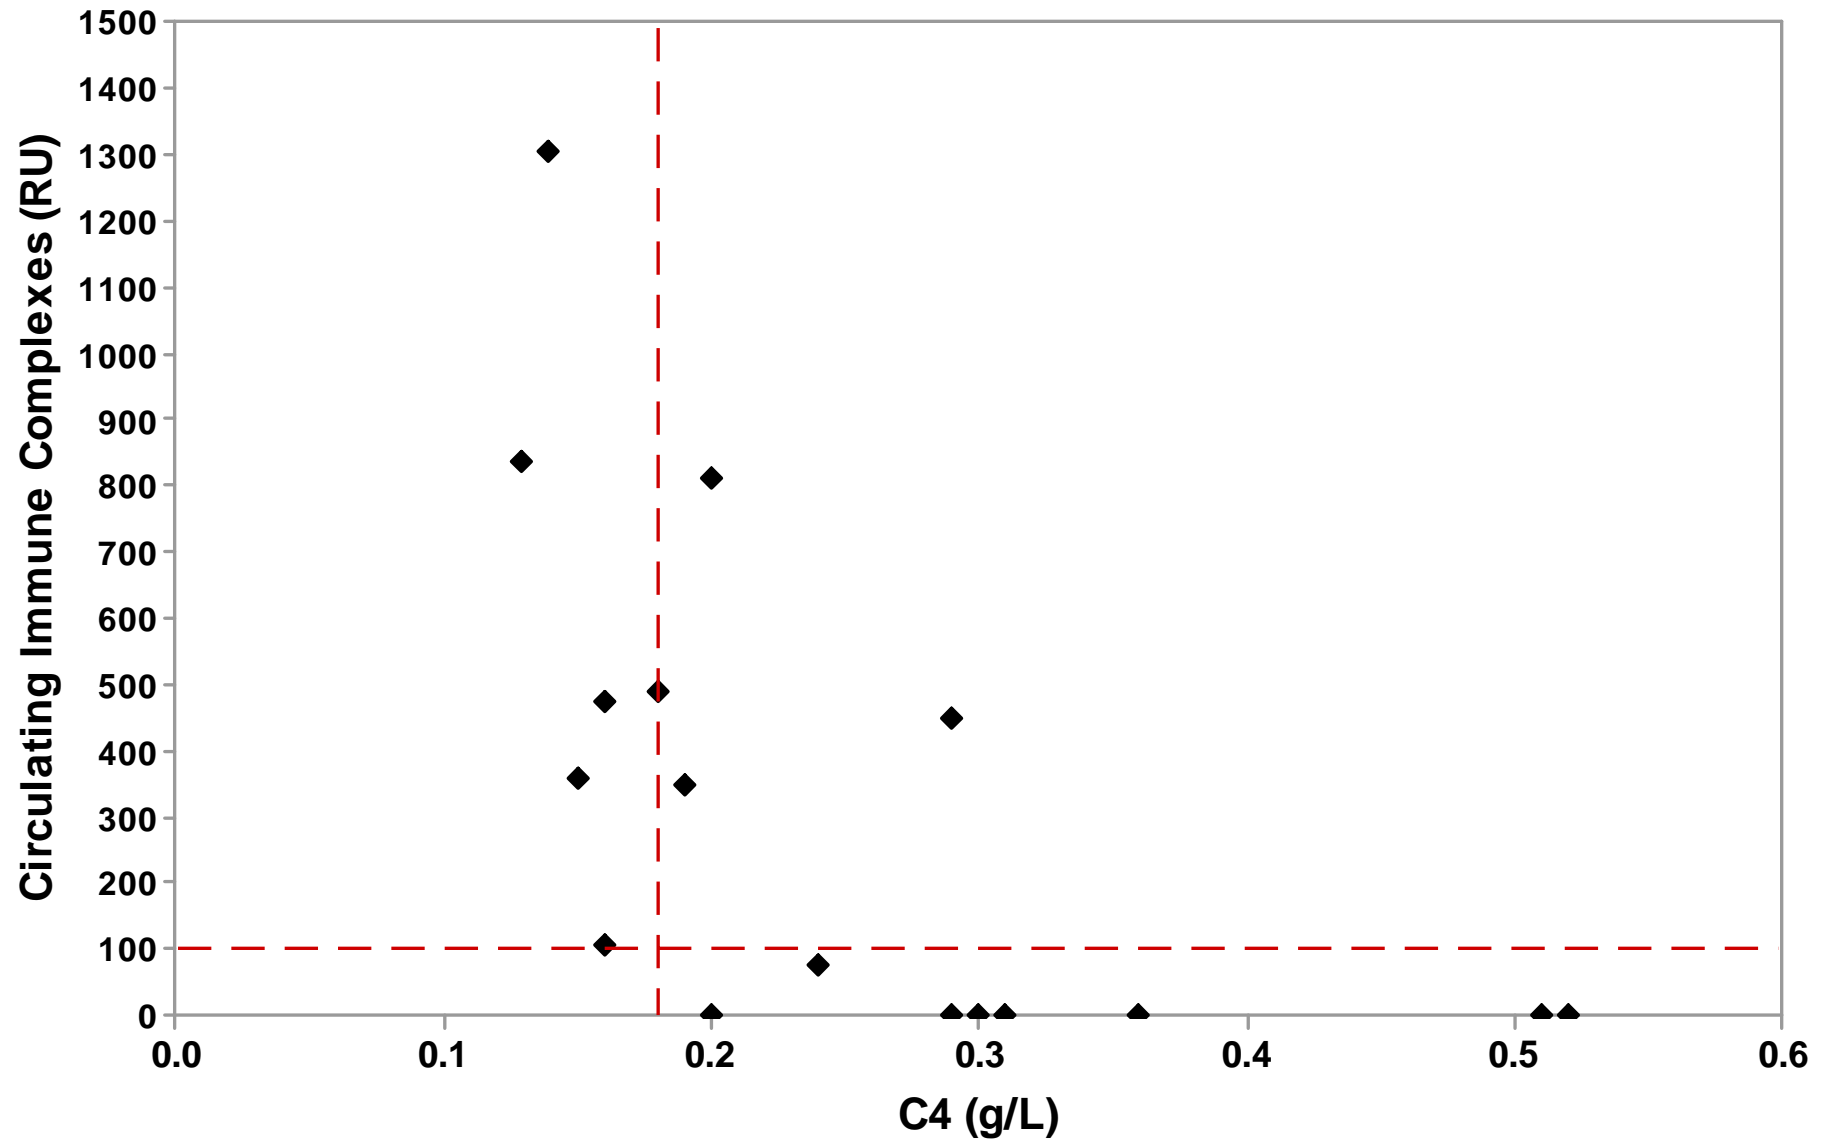

Supplement: mmc4.pdf [file mmc4.pdf]
