# Supplementary material for: Factor H autoantibody is associated with atypical hemolytic uremic syndrome in children in the United Kingdom and Ireland
Source: PubMed Central journal article supplement (PMC5652378; doi:10.1016/j.kint.2017.04.028), 2017-11

### Supplemental Figure 4: Outcome according to dialysis requirement at presentation.

75% of patients who required dialysis within one week of presentation fully recovered renal function.

\*Defined as dialysis within the first week of presentation

\*\*Defined as recurrence >1 month after presentation and >15 days after disease remission

† Management: supportive:1, PEX:1

‡ Management: PEX:4, eculizumab: 2

Abbreviations: ERF, established renal failure; PEX, plasma exchange.

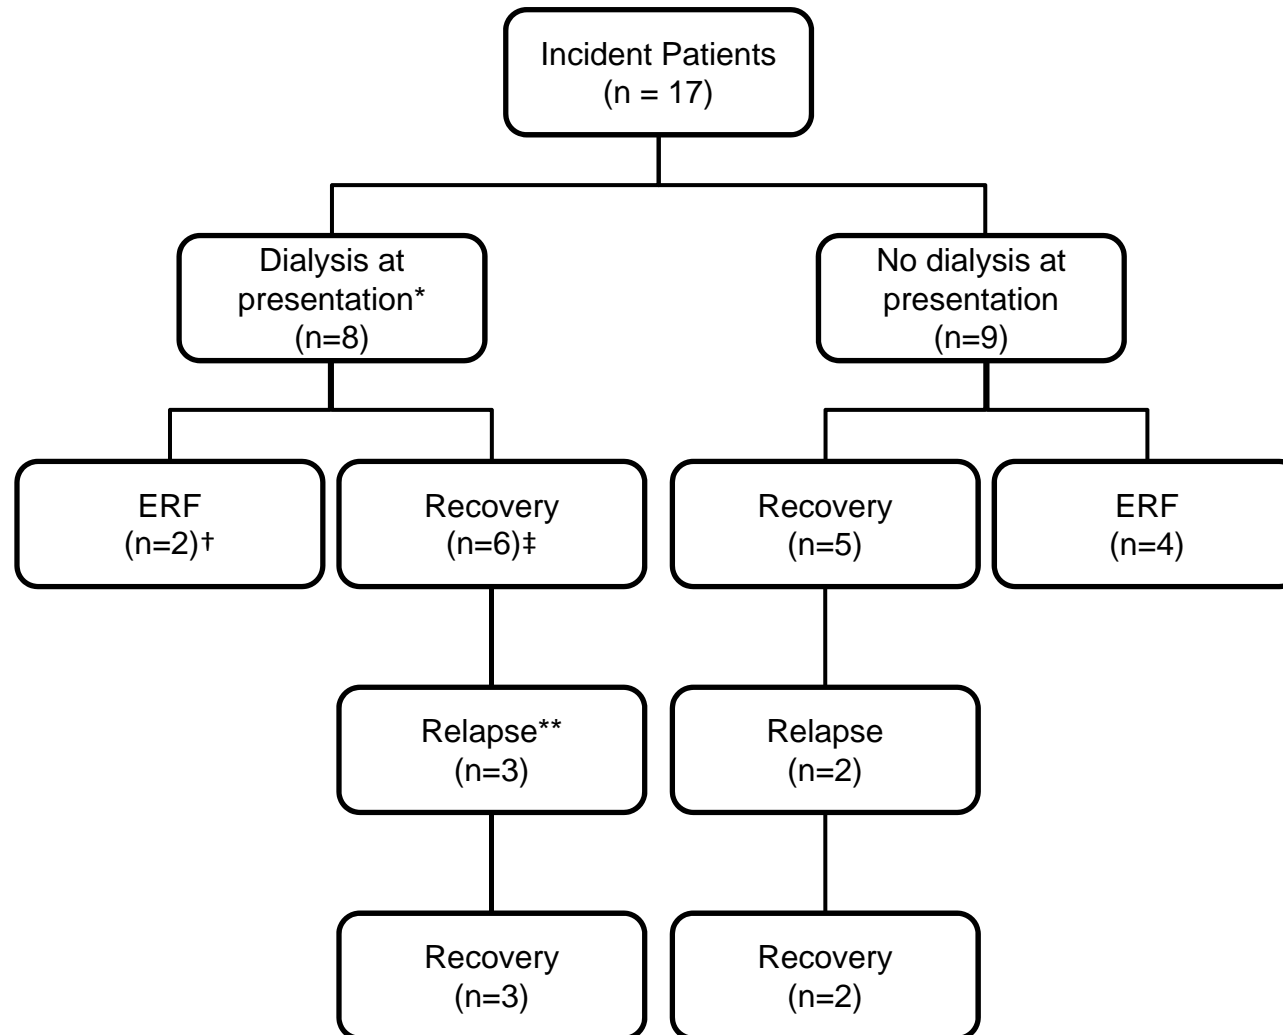

Supplement: mmc5.pdf [file mmc5.pdf]
