# Supplementary material for: Factor H autoantibody is associated with atypical hemolytic uremic syndrome in children in the United Kingdom and Ireland
Source: PubMed Central journal article supplement (PMC5652378; doi:10.1016/j.kint.2017.04.028), 2017-11
Supplement: mmc7.pdf [file mmc7.pdf]

**Supplemental Table 1: Autoantibody reactivity with short factor H fragments.**  
*CFHR1* copy number and autoantibody binding to factor H fragments (SCRs 1-7, 8-15, 16-18 and 19-20)  
 (positive threshold >100RU).

Abbreviations: SCR = Short Consensus Repeat.

| <b>Patient</b> | <b><i>CFHR1</i> copy number</b> | <b>SCRs 1-7</b> | <b>SCRs 8-15</b> | <b>SCRs 16-18</b> | <b>SCRs 19-20</b> |
|----------------|---------------------------------|-----------------|------------------|-------------------|-------------------|
| <b>2</b>       | 0                               | 130             | 0                | 24                | 613               |
| <b>4</b>       | 0                               | 7               | 0                | 0                 | 2171              |
| <b>5</b>       | 0                               | 235             | 3                | 57                | 144               |
| <b>6</b>       | 2                               | 3126            | 9                | 615               | 0                 |
| <b>10</b>      | 0                               | 0               | 0                | 0                 | 1570              |
| <b>12</b>      | 0                               | 41              | 450              | 0                 | 377               |
| <b>14</b>      | 0                               | 33              | 60               | 0                 | 2365              |
| <b>15</b>      | 0                               | 7               | 0                | 81                | 2245              |
| <b>16</b>      | 0                               | 0               | 0                | 0                 | 239               |
| <b>17</b>      | 0                               | 1               | 3                | 0                 | 2370              |
| <b>18</b>      | 0                               | 42              | 0                | 0                 | 981               |
| <b>19</b>      | 2                               | 5               | 0                | 0                 | 410               |
| <b>20</b>      | 0                               | 46              | 0                | 0                 | 219               |
| <b>21</b>      | 0                               | 496             | 76               | 0                 | 2714              |
| <b>22</b>      | 2                               | 327             | 0                | 13                | 1                 |
| <b>23</b>      | 0                               | 0               | 0                | 0                 | 1050              |
| <b>24</b>      | 0                               | 0               | 0                | 104               | 3243              |
