# Supplementary material for: Factor H autoantibody is associated with atypical hemolytic uremic syndrome in children in the United Kingdom and Ireland
Source: PubMed Central journal article supplement (PMC5652378; doi:10.1016/j.kint.2017.04.028), 2017-11
Supplement: mmc8.pdf [file mmc8.pdf]

**Supplemental Table 2: Initial titres of factor H autoantibody (aFH), circulating immune complexes (CiC), and autoantibody reactivity with factor H-related proteins 1-5 (positive threshold >100RU)**

Abbreviations: aFH, factor H autoantibody; CiC, circulating immune complexes; FHR, factor H related proteins; RU, relative units.

| <b>Patient</b> | <b>aFH</b> | <b>CiC</b> | <b>FHR1</b> | <b>FHR2</b> | <b>FHR3</b> | <b>FHR4</b> | <b>FHR5</b> |
|----------------|------------|------------|-------------|-------------|-------------|-------------|-------------|
| <b>2</b>       | 630        | 357        | 694         | 74          | 0           | 0           | 0           |
| <b>4</b>       | 1249       | 0          | 792         | 0           | 0           | 0           | 21          |
| <b>5</b>       | 573        | 812        | 0           | 352         | 147         | 169         | 43          |
| <b>6</b>       | 2017       | 0          | 0           | 0           | 0           | 0           | 0           |
| <b>10</b>      | 3432       | 840        | 612         | 0           | 0           | 0           | 0           |
| <b>12</b>      | 812        | 350        | 0           | 0           | 0           | 0           | 0           |
| <b>14</b>      | 722        | 0          | 132         | 0           | 0           | 29          | 3           |
| <b>15</b>      | 4000       | 450        | 1380        | 65          | 39          | 0           | 0           |
| <b>16</b>      | 4000       | 0          | 1350        | 0           | 0           | 0           | 45          |
| <b>17</b>      | 2194       | 75         | 600         | 0           | 0           | 0           | 41          |
| <b>18</b>      | 2130       | 490        | 900         | 22          | 0           | 0           | 0           |
| <b>19</b>      | 2319       | 0          | 500         | 0           | 0           | 0           | 0           |
| <b>20</b>      | 1594       | 106        | 0           | 0           | 0           | 0           | 0           |
| <b>21</b>      | 971        | 0          | 700         | 0           | 0           | 0           | 0           |
| <b>22</b>      | 277        | 0          | 0           | 0           | 37          | 30          | 21          |
| <b>23</b>      | 1350       | 474        | 279         | 0           | 359         | 468         | 341         |
| <b>24</b>      | 3396       | 1307       | 2645        | 0           | 0           | 20          | 0           |
