# Supplementary material for: Factor H autoantibody is associated with atypical hemolytic uremic syndrome in children in the United Kingdom and Ireland
Source: PubMed Central journal article supplement (PMC5652378; doi:10.1016/j.kint.2017.04.028), 2017-11
Supplement: mmc9.pdf [file mmc9.pdf]

**Supplemental Table 3: Treatment modality and resultant renal function**

| Patient | Treatment at first presentation | Dialysis (duration if recovery) | ERF | Relapse  | Renal Transplant           | Subsequent treatment           | Duration of follow up (months) | eGFR (mL/min/1.73m <sup>2</sup> ) at most recent follow up |
|---------|---------------------------------|---------------------------------|-----|----------|----------------------------|--------------------------------|--------------------------------|------------------------------------------------------------|
| 2       | FFP, PEX                        | Yes (5 weeks)                   | No  | Yes      | n/a                        | PEX at relapse                 | 163                            | >60 <sup>†</sup>                                           |
| 4       | FFP, PEX, IVIG                  | Yes                             | Yes | No       | Yes<br>aHUS recurrence     | ECU post-transplant            | 75                             | 47.6*                                                      |
| 5       | PEX                             | Yes                             | Yes | No       | Yes<br>Graft failure (AMR) |                                | 151                            | ERF                                                        |
| 6       | PEX                             | Yes                             | Yes | No       | No. Ineligible             |                                | 130                            | ERF                                                        |
| 10      | PEX, CS                         | No                              | No  | Multiple | n/a                        | Regular PEX,<br>withdrawn 2012 | 117                            | >60*                                                       |
| 12      | FFP, PEX, IVIG                  | Yes                             | Yes | No       | Yes                        |                                | 98                             | >60*                                                       |
| 14      | FFP, ECU                        | No                              | No  | No       | n/a                        |                                | 7                              | >60*                                                       |
| 15      | ECU                             | Yes (5 days)                    | No  | No       | n/a                        |                                | 11                             | >60*                                                       |
| 16      | PEX                             | Yes (3 days)                    | No  | Yes      | n/a                        | ECU at relapse                 | 81                             | >53*                                                       |
| 17      | PEX                             | No                              | No  | No       | n/a                        |                                | 108                            | >60*                                                       |
| 18      | FFP, PEX                        | No                              | No  | Yes      | n/a                        | PEX at relapse                 | 123                            | >60*                                                       |
| 19      | SUP                             | Yes                             | Yes | No       | Yes                        |                                | 64                             | 48.4*                                                      |
| 20      | ECU                             | No                              | No  | No       | n/a                        |                                | 62                             | >60*                                                       |
| 21      | FFP, PEX                        | Yes (6 days)                    | No  | Yes      | n/a                        | PEX, RTX at relapse            | 9                              | >60 <sup>†</sup>                                           |
| 22      | SUP                             | Yes                             | Yes | No       | Yes                        |                                | 84                             | >60*                                                       |
| 23      | PEX                             | Yes (5 days)                    | No  | No       | n/a                        |                                | 12                             | >60*                                                       |
| 24      | ECU                             | Yes (5 weeks)                   | No  | No       | n/a                        |                                | 22                             | 52.3*                                                      |

eGFR: by Schwartz formula for patients <18 years at last follow up (\*) and by abbreviated MDRD equation for patients >18 at last follow up (†)

Abbreviations: AMR, antibody mediated rejection; CS, corticosteroids; ECU, eculizumab; eGFR: estimated glomerular filtration rate; ERF, established renal failure; FFP, fresh frozen plasma; IVIG, intravenous immunoglobulin; MMF, mycophenolate mofetil; n/a, not applicable; PEX, plasma exchange; RTX, rituximab; SUP, supportive management.
