# Supplementary material for: Factor H autoantibody is associated with atypical hemolytic uremic syndrome in children in the United Kingdom and Ireland
Source: PubMed Central journal article supplement (PMC5652378; doi:10.1016/j.kint.2017.04.028), 2017-11
Supplement: mmc10.pdf [file mmc10.pdf]

Supplemental Table 4: Comparison with other cohorts

|                                                 | Dragon-Durey <i>et al.</i> <sup>22</sup>                                                   | Sana <i>et al.</i> <sup>28</sup> | Sinha <i>et al.</i> <sup>6</sup>                              | Lee <i>et al.</i> <sup>24</sup>           | Geerdink <i>et al.</i> <sup>23</sup> | Noris <i>et al.</i> <sup>25</sup>   | Abarrategui-Garrido <i>et al.</i> <sup>19</sup> | Hofer <i>et al.</i> <sup>15</sup> | Moore <i>et al.</i> <sup>9</sup>                                 | UK and Ireland                                                  |
|-------------------------------------------------|--------------------------------------------------------------------------------------------|----------------------------------|---------------------------------------------------------------|-------------------------------------------|--------------------------------------|-------------------------------------|-------------------------------------------------|-----------------------------------|------------------------------------------------------------------|-----------------------------------------------------------------|
| # Patients                                      | 45 (38 children)                                                                           | 4 children                       | 138 children                                                  | 15 children                               | 6 children                           | 8 (6 children)                      | 7 children                                      | 25 children                       | 13 children                                                      | 17 children                                                     |
| Age (years)                                     | Median 8.5 (children only)                                                                 | Mean 6                           | Mean 8.4                                                      | Mean 8                                    | 1-7 years at onset in 83.3%          | N/A                                 | Mean 5.2                                        | Mean 7.9                          | Median 8                                                         | Median 8                                                        |
| % Male                                          | 66% (children only)                                                                        | N/A                              | 72.5%                                                         | 27%                                       | 50%                                  | 50%                                 | N/A                                             | N/A                               | 46%                                                              | 65%                                                             |
| Gastrointestinal symptoms                       | 84% (diarrhoea 53%)                                                                        | 25%                              | Diarrhoea 9.4%                                                | Diarrhoea 13%                             | 83%                                  | 14.3%                               | N/A                                             | 87%                               | N/A                                                              | 75% (diarrhoea 50%)                                             |
| Extra-renal manifestations                      | 50% hepatitis<br>23% pancreatitis<br>23.5% seizures                                        | N/A                              | 57.3% hepatic<br>40.6% seizures                               | 7% hepatitis<br>7% pancreatitis<br>7% CNS | N/A                                  | 14.3% CNS                           | N/A                                             | 11% CNS<br>58% other              | N/A                                                              | 19% seizures<br>13% hepatitis<br>6% pancreatitis                |
| Concomitant rare genetic variants               | 0/26                                                                                       | 0                                | N/A                                                           | 0/15                                      | 2/6 (33%): <i>CFI</i> , <i>C3</i>    | 2/8 (25%): <i>CFH</i> x2            | 0/7                                             | 1/8 (12.5%): <i>CFI</i>           | 5/13 (38%): <i>CFH</i> , <i>CFI</i> , <i>CD46</i> , <i>C3</i> x2 | 7/17 (41%): <i>CFH</i> , <i>CFI</i> x4, <i>CD46</i> , <i>C3</i> |
| Complement analysis                             | Low C3                                                                                     | 58%                              | 62%                                                           | 67%                                       | N/A                                  | 43%                                 | 57%                                             | 41%                               | 27%                                                              | 24%                                                             |
|                                                 | Low C4                                                                                     | 0                                | N/A                                                           | N/A                                       | N/A                                  | 14%                                 | 14%                                             | 15%                               | 27%                                                              | 29%                                                             |
|                                                 | Low FH                                                                                     | 22%                              | N/A                                                           | N/A                                       | N/A                                  | 29%                                 | 0                                               | N/A                               | 9%                                                               | 12%                                                             |
| <b>Treatment and evolution of first episode</b> |                                                                                            |                                  |                                                               |                                           |                                      |                                     |                                                 |                                   |                                                                  |                                                                 |
| Supportive                                      | 6 (13% of total): ERF 1 (17%); relapses 2 (33%); TR 1 (17%); CKD 1 (17%)                   | 0                                | N/A                                                           | N/A                                       | 2 (33%)                              | N/A                                 | N/A                                             | N/A                               | 10 (77%)                                                         | 2 (12% of total): ERF 2 (100%)                                  |
| PI                                              | 6 (13% of total): relapses 5 (83%), TR 1 (17%)                                             | 0                                | N/A                                                           | 91%                                       | N/A                                  | N/A                                 | N/A                                             | N/A                               | N/A                                                              | n/a                                                             |
| PEX                                             | 15 (33% of total): ERF 1 (7%); death 1 (7%); CKD 3 (20%); TR 3 (20%); relapses 6 (40%)     | 0                                | 105 (76%) in total                                            | 69%                                       | N/A                                  | N/A                                 | N/A                                             | N/A                               | 3 (23%)                                                          | 11 (65% of total): ERF 4 (36%); relapses 5 (45%)                |
| PEX or PI                                       | N/A                                                                                        | 0                                | N/A                                                           | N/A                                       | 4/6 (67%) (chronic in 3)             | 7/8 (87.5%)                         | 5/7 (71%)                                       | 18/19 (95%)                       | N/A                                                              | n/a                                                             |
| PEX + Corticosteroids                           | 0                                                                                          | 0                                | N/A                                                           | N/A                                       | N/A                                  | 3/8 (37.5%): remission in 2/3 (67%) | 1                                               | N/A                               | N/A                                                              | 1                                                               |
| PEX + Immunosuppression                         | 3 (6.7% of total)                                                                          | 4 (100%)                         | 87 (63%) IS                                                   | 7 (54%) steroids +/- IS                   | 0                                    | 3/8 (37.5%)                         | 2 (29%)                                         | 0                                 | 0                                                                | 0                                                               |
|                                                 | Azathioprine                                                                               | 0                                | N/A                                                           | N/A                                       | n/a                                  | 0                                   | 1                                               | n/a                               | n/a                                                              | n/a                                                             |
|                                                 | Steroids + cyclophosphamide                                                                | 2: no renal sequelae             | 4 (at relapse in patient treated with rituximab)              | 49                                        | N/A                                  | n/a                                 | 0                                               | n/a                               | n/a                                                              | n/a                                                             |
|                                                 | Steroids + rituximab                                                                       | 0                                | (rituximab initially in 1)                                    | 18                                        | N/A                                  | n/a                                 | 0                                               | n/a                               | n/a                                                              | n/a                                                             |
|                                                 | Steroids + MMF                                                                             | 1: no renal sequelae             | 0                                                             | N/A                                       | N/A                                  | n/a                                 | 0                                               | 0                                 | n/a                                                              | n/a                                                             |
| Ecuzumab                                        | 0                                                                                          | 0                                | 0                                                             | 0                                         | 0                                    | 0                                   | 0                                               | 0                                 | 0                                                                | 4 (24% of total): 100% sustained remission                      |
| Maintenance Immunosuppression                   | N/A                                                                                        | n/a                              | 47 (34%): steroids alone 21; plus azathioprine 8; plus MMF 18 | N/A                                       | n/a                                  | N/A                                 | N/A                                             | n/a                               | n/a                                                              | 0                                                               |
| <b>Long term outcomes</b>                       |                                                                                            |                                  |                                                               |                                           |                                      |                                     |                                                 |                                   |                                                                  |                                                                 |
| Sustained remission                             | N/A (25% no renal sequelae)                                                                | 100% after cyclophosphamide      | N/A                                                           | 62% no sequelae                           | 0                                    | 12% complete remission              | N/A                                             | N/A                               | N/A                                                              | n/a                                                             |
| Relapse                                         | 58%                                                                                        | 25% (following rituximab in 1)   | 14 (11.5%); (4 whilst on IS)                                  | 31%                                       | 50%                                  | 37.5%                               | N/A                                             | N/A                               | 23%                                                              | 29% overall                                                     |
| ERF                                             | 27%                                                                                        | 0                                | 32.8%                                                         | 0                                         | 0                                    | 63%                                 | 43%                                             | N/A                               | 46%                                                              | 35% overall                                                     |
| CKD (not including ERF)                         | 39%                                                                                        | 0                                | N/A                                                           | 15%                                       | N/A                                  | N/A                                 | N/A                                             | N/A                               | N/A                                                              | CKD stage 3: 1 (6%)                                             |
| Death                                           | 4 (8.9%)                                                                                   | 0                                | 20 (16.4%)                                                    | 0                                         | 1 (16.7%)                            | 0                                   | 1 (14.3%)                                       | N/A                               | 0                                                                | 0                                                               |
|                                                 | Deaths: unknown; sudden death post dialysis; pulmonary hypertension; cardiac insufficiency | n/a                              | Deaths: complications of renal failure 16; sepsis 4           | n/a                                       | N/A                                  | n/a                                 | Death: myocarditis                              | N/A                               | n/a                                                              | n/a                                                             |
| <b>Outcome of transplantation</b>               |                                                                                            |                                  |                                                               |                                           |                                      |                                     |                                                 |                                   |                                                                  |                                                                 |
| Recurrence                                      | 3 without specific management                                                              | n/a                              | 0                                                             | n/a                                       | 0                                    | 1                                   | 0                                               | N/A                               | 0                                                                | 1 early recurrence ( <i>CFI</i> mutation) treated with Ecuzumab |
| No recurrence                                   | 3 with specific management                                                                 | n/a                              | 3 with specific management (PEX/IVIG/rituximab)               | n/a                                       | 0                                    | 0                                   | 2                                               | N/A                               | 3                                                                | 4 without specific management (1 graft loss rejection)          |

Abbreviations: CKD, chronic kidney disease; ERF, established renal failure; FH, factor H; IS, immunosuppression; IVIG, intravenous immunoglobulin; N/A, not available; n/a, not applicable; PEX, plasma exchange; PI, plasma infusion; TR, treatment resistance.
